# Supplementary material
Source: PubMed Central journal article supplement (PMC2674258)
Supplement: supp_136_9_1509__1.pdf [file supp_136_9_1509__1.pdf]

**Table S1. Seedling growth phenotypes\***

|                                             | Ler        | IAA18-1/iaa18-1 | iaa18-1/iaa18-1 |
|---------------------------------------------|------------|-----------------|-----------------|
| Hypocotyl length in light (mm) <sup>†</sup> | 2.8 (0.4)  | nd              | 5.7 (0.5)       |
| Hypocotyl length in dark (mm) <sup>†</sup>  | 18.5 (2.0) | nd              | 16.0 (1.3)      |
| Lateral root number <sup>‡</sup>            | 48.2 (6.6) | 39.2 (8.3)      | 1.6 (1.4)       |
| Root length (mm) <sup>§</sup>               | 26.1 (6.3) | 11.8 (3.4)      | 7.9 (3.0)       |

\*Data are means (s.d.).

<sup>†</sup>Seedlings were grown on 1 × MS plates in constant light or darkness for 6 days (*n*=40).

<sup>‡</sup>Seedlings were grown on 1 × MS, 1% sucrose plates for 20 days under long day conditions (*n*=20).

<sup>§</sup>Seedlings were grown on 1 × MS, 1% sucrose plates for 7 days under constant light (*n*=25).
