# Supplementary material
Source: PubMed Central journal article supplement (PMC2674258)
Supplement: supp_136_9_1509__2.pdf [file supp_136_9_1509__2.pdf]

**Table S2. Numbers of floral organs**

|                                | Sepals      | Petals       | Stamens      | Carpels     |
|--------------------------------|-------------|--------------|--------------|-------------|
| Wild type ( <i>Ler</i> )       | 4.02 (0.16) | 4.02 (0.16)  | 5.5 (0.71)   | 2 (0)       |
| <i>iaa18-1//IAA18-1</i>        | 4 (0)       | 3.93 (0.35)  | 5.33 (0.72)  | 2 (0)       |
| <i>iaa18-1/iaa18-1</i>         | 3.93 (0.35) | 3.35 (0.88)* | 4.45 (0.59)* | 2 (0)       |
| <i>bd1//BDL</i>                | 4 (0)       | 3.95 (0.22)  | 5.2 (0.72)   | 2 (0)       |
| <i>iaa18-1//IAA18 bd1//BDL</i> | 3.93 (0.26) | 2.25 (0.89)* | 4.53 (0.74)* | 1.98 (0.16) |

Plants were grown in long days. Data are means (s.d.) from 40 flowers.

\*Significant difference from the mean wild-type value by *t*-test ( $P < 0.05$ ).
