# Supplementary material
Source: PubMed Central journal article supplement (PMC2674258)
Supplement: supp_136_9_1509__4.pdf [file supp_136_9_1509__4.pdf]

**Table S4. Frequency of asymmetric PIN1:GFP expression in wild-type and *iaa18-1/IAA18* embryos\***

| Embryo genotype           | Early globular stage |                         | Mid-globular stage |                         | Late globular/transition stage |                        |
|---------------------------|----------------------|-------------------------|--------------------|-------------------------|--------------------------------|------------------------|
|                           | <i>IAA18/IAA18</i>   | <i>iaa18-1/IAA18</i>    | <i>IAA18/IAA18</i> | <i>iaa18-1/IAA18</i>    | <i>IAA18/IAA18</i>             | <i>iaa18-1/IAA18</i>   |
| Experiment 1 <sup>†</sup> | 1/22 (5%)            | 5/13 (38%)              | 0/23 (0%)          | 6/11 (55%)              | 0/5 (0%)                       | 1/3 (33%)              |
| Experiment 2 <sup>†</sup> | 0/12 (0%)            | 5/38 (13%)              | 0/19 (0%)          | 8/23 (35%)              | 0/11 (0%)                      | 1/4 (25%)              |
| Experiment 3 <sup>†</sup> | 0/27 (0%)            | 3/17 (18%) <sup>†</sup> | 0/26 (0%)          | 7/18 (39%) <sup>†</sup> | 0/17 (0%)                      | 2/4 (50%) <sup>†</sup> |
| Total                     | 1/61 (2%)            | 13/68 (19%)             | 0/68 (0%)          | 21/52 (40%)             | 0/33 (0%)                      | 4/11 (36%)             |

\*Shown are numbers of embryos with asymmetric PIN1:GFP expression over number of embryos observed, and calculated percentages (in parentheses).

<sup>†</sup>In experiments 1 and 2, pollen from wild-type or *iaa18-1* homozygous plants was used to pollinate homozygous marker lines that were wild-type at *IAA18*. In experiment 3, a plant homozygous for  $P_{PIN1}:PIN1:GFP$  and heterozygous for *iaa18-1* was selfed, and '*iaa18-1/+*' embryos were therefore actually a mixture of wild-type, *iaa18-1/IAA18* and *iaa18-1/iaa18-1* genotypes in roughly 1:2:1 ratio. In experiment 1, we used a  $P_{PIN1}:PIN1:GFP P_{REV}:REV:Venus P_{FIL}:DsRED$  marker line, and in experiments 2 and 3 we used a  $P_{PIN1}:PIN1:GFP P_{STM}:YFP P_{WUS}:DsRED$  line. Expression of  $P_{REV}:REV:Venus$ ,  $P_{FIL}:DsRED$ ,  $P_{STM}:YFP$  and  $P_{WUS}:DsRED$  markers in these lines were not analyzed.
