# Supplementary material
Source: PubMed Central journal article supplement (PMC2674258)
Supplement: supp_136_9_1509__5.pdf [file supp_136_9_1509__5.pdf]

**Table S5. Rescue of IAA gain-of-function phenotypes by ARF overexpression**

| T1 plant genotype                                   | Number of transformants | Number with flat leaves (terminal pin or flower) |
|-----------------------------------------------------|-------------------------|--------------------------------------------------|
| <i>P</i> <sub>35S</sub> : <i>MP/ARF5</i>            | 103                     | 103 (13)                                         |
| <i>iaa18-1/ P</i> <sub>35S</sub> : <i>MP/ARF5</i>   | 79                      | 28 (0)                                           |
| <i>bdI/ P</i> <sub>35S</sub> : <i>MP/ARF5</i>       | 58                      | 16 (0)                                           |
| <i>P</i> <sub>35S</sub> : <i>NPH4/ARF7</i>          | 10                      | 10                                               |
| <i>iaa18-1/ P</i> <sub>35S</sub> : <i>NPH4/ARF7</i> | 6                       | 0                                                |
| <i>bdI/ P</i> <sub>35S</sub> : <i>NPH4/ARF7</i>     | 8                       | 0                                                |
| <i>P</i> <sub>35S</sub> : <i>ARF6</i>               | 33                      | 33                                               |
| <i>iaa18-1/ P</i> <sub>35S</sub> : <i>ARF6</i>      | 54                      | 0                                                |
| <i>bdI/ P</i> <sub>35S</sub> : <i>ARF6</i>          | 23                      | 0                                                |
| <i>P</i> <sub>35S</sub> : <i>ARF8</i>               | 93                      | 93                                               |
| <i>iaa18-1/ P</i> <sub>35S</sub> : <i>ARF8</i>      | 123                     | 0                                                |
| <i>bdI/ P</i> <sub>35S</sub> : <i>ARF8</i>          | 48                      | 0                                                |

Numbers of transformants in wild-type backgrounds are pooled results from transformations into *iaa18-1/IAA18* or *bdI/BDL* parent plants. Plants with flat leaves were genotyped for *iaa18-1* or *bdI* mutations using PCR-based assays. Two of the *iaa18-1/ P*<sub>35S</sub>:*MP/ARF5* plants were homozygous for *iaa18-1*. Numbers of *P*<sub>35S</sub>:*MP/ARF5* transformants with a terminal pin or flower structure on the inflorescence are indicated in parentheses. In addition to T1 transformants listed, we also crossed a *P*<sub>35S</sub>:*NPH4/ARF7* line with *iaa18-1/IAA18*, and failed to see suppression of *iaa18-1* vegetative phenotypes among *iaa18-1/IAA18 P*<sub>35S</sub>:*NPH4/ARF7*- F1 plants.
